# Supplementary material for: The Role of Cilostazol, a Phosphodiesterase-3 Inhibitor, in the Development of Atherosclerosis and Vascular Biology: A Review with Meta-Analysis
Source: MDPI journal article supplement (doi:10.3390/ijms25052593), 2024-02-23
Supplement: s1 [file s1]

**Supplementary Table S1.** Search strategy in detail.

| Category                | Search terms                                                                                                                                                                                                                                                                                                        |
|-------------------------|---------------------------------------------------------------------------------------------------------------------------------------------------------------------------------------------------------------------------------------------------------------------------------------------------------------------|
| Terms                   | Pubmed: MeSH term<br>Embase: Entrée term with synonyms on major focus<br>Cochrane: Suggested keywords                                                                                                                                                                                                               |
| Intervention/Comparison | Pubmed: cilostazol<br>Embase: cilostazol<br>Cochrane: cilostazol                                                                                                                                                                                                                                                    |
| Outcomes                | Pubmed: 'major adverse cardiovascular events' OR 'myocardial infarction' OR 'stroke' OR 'cardiovascular diseases'<br>Embase: 'cardiovascular disease' OR 'heart infarction' OR 'cerebrovascular accident'<br>Cochrane: 'cardiovascular event rate' OR 'cardiovascular disease' OR 'myocardial infarction' OR stroke |
| Study design            | Randomized controlled trial                                                                                                                                                                                                                                                                                         |
| Intervention time       | At least 3 months<br>Studies with intervention periods of less than 3 months are excluded, as these cases often transitioned to other conventional therapies or targeted secondary prevention that could be attributed to factors unrelated to atherosclerosis.                                                     |
| Restrictions            | Filter: humans, English, randomized controlled trial<br>Search field: title or abstract<br>Publication type: article<br>Not animals                                                                                                                                                                                 |
| Search date             | From 2000/1/1 to 2023/7/13                                                                                                                                                                                                                                                                                          |
| Search results          | Pubmed: 83 results<br>Embase: 188 results<br>Cochrane: 225 results                                                                                                                                                                                                                                                  |

**Supplementary Table S2.** Definition of cardiovascular events.

| Trial                       | Major adverse cardiovascular events                                                                                                                                                                                           |
|-----------------------------|-------------------------------------------------------------------------------------------------------------------------------------------------------------------------------------------------------------------------------|
| Gotoh F et al. 2000 [95]    | Cerebral infarction, intracranial hemorrhage, MI, or vascular death                                                                                                                                                           |
| Douglas JS et al. 2005 [96] | Major adverse cardiovascular events not specified                                                                                                                                                                             |
| Chen YD et al. 2006 [97]    | Death, nonfatal MI, stent thrombosis, TLR, or stroke                                                                                                                                                                          |
| Lee SW et al. 2007 [98]     | Death, MI, or target vessel revascularization                                                                                                                                                                                 |
| Hiatt WR et al. 2008 [99]   | Total number of cerebrovascular accidents, carotid artery stenosis, femoral artery occlusion, and cardiac arrest                                                                                                              |
| Huang Y et al. 2008 [100]   | Recurrent stroke, new MI, transient ischemic attack, vascular event—including pulmonary embolism, deep venous thrombosis, or peripheral arterial occlusion disorder—death from vascular causes, or death from any other cause |
| Lee SW et al. 2008 [101]    | Death, MI, or target lesion revascularization                                                                                                                                                                                 |
| Guo JJ et al. 2009 [102]    | Total number of deaths, acute coronary event, intracerebral hemorrhage, and ischemic stroke                                                                                                                                   |
| Han Y et al. 2009 [103]     | Cardiac death, nonfatal MI, stroke, or TVR                                                                                                                                                                                    |

|                              |                                                                                                                                                                                                              |
|------------------------------|--------------------------------------------------------------------------------------------------------------------------------------------------------------------------------------------------------------|
| Soga Y et al. 2009 [104]     | Total number of deaths, nonfatal MI, stroke, and repeat revascularization                                                                                                                                    |
| Katakami N et al. 2010 [18]  | Sudden cardiovascular death, new onset or recurrence of cerebral infarction or transient cerebral ischemia, development of angina or acute myocardial ischemia, or exacerbation of peripheral artery disease |
| Shinohara Y et al. 2010 [20] | Any stroke, transient ischemic attack, angina pectoris, MI, heart failure, or any hemorrhage requiring hospital admission                                                                                    |
| Kwon SU et al. 2011 [105]    | Vascular death, nonfatal stroke, or nonfatal MI                                                                                                                                                              |
| Lee SW et al. 2011 [106]     | Death, MI, or ischemic-driven TLR                                                                                                                                                                            |
| Lee YS et al. 2011 [107]     | Vascular death, nonfatal stroke, nonfatal MI, hospitalization for cardiovascular events                                                                                                                      |
| Suh JW et al. 2011 [108]     | Cardiac death, MI, ischemic stroke, or TLR                                                                                                                                                                   |
| Iida O et al. 2013 [109]     | All-cause death, MI, or stroke                                                                                                                                                                               |
| Gao W et al. 2013 [110]      | Death, MI, or TLR                                                                                                                                                                                            |
| Youn YJ et al. 2014 [111]    | All-cause mortality, any MI, or repeat revascularization                                                                                                                                                     |
| Uchiyama S et al. 2015 [112] | Death, ischemic stroke, myocardial infarct, or other vascular events                                                                                                                                         |
| Ueda H et al. 2016 [113]     | All-cause death, nonfatal MI, nonfatal stroke, or coronary or cerebrovascular revascularization                                                                                                              |
| Zheng X-T et al. 2016 [114]  | Cardiac death, MI, or TLR                                                                                                                                                                                    |
| Tang Y-D et al. 2018 [115]   | All-cause death, MI, target vessel revascularization, or stroke                                                                                                                                              |
| Lee CH et al. 2018 [116]     | All-cause death, MI, ischemic stroke, or ischemic-driven TVR                                                                                                                                                 |
| Kim BJ et al. 2018 [117]     | Stroke (including hemorrhagic stroke), MI, or vascular death                                                                                                                                                 |
| Hong S et al. 2019 [118]     | Acute MI, coronary-artery bypass graft, PCI, ischemic stroke, hemorrhagic stroke, or death due to any cardiovascular event                                                                                   |
| Toyoda K et al. 2019 [119]   | Vascular death, stroke, or MI                                                                                                                                                                                |
| Chen Y-C et al. 2019 [120]   | Death, MI, or revascularization of the original lesion                                                                                                                                                       |
| Uchiyama S et al. 2021 [121] | Stroke, MI, or vascular death                                                                                                                                                                                |
| Kalantzi K et al. 2021 [122] | Acute ischemic stroke, transient ischemic attack, acute MI, or death from vascular causes                                                                                                                    |
| Sohn M et al. 2022 [123]     | Cardiovascular death, nonfatal MI, nonfatal stroke, angina, or hospitalization for heart failure                                                                                                             |
| Lin J-L et al. 2022 [124]    | Cardiovascular death, nonfatal MI, nonfatal stroke, hospitalization for heart failure, or unplanned coronary revascularization                                                                               |
| Wardlaw JM et al. 2023 [125] | Total number of stroke, transient ischemic attack, MI, or all-cause death                                                                                                                                    |
| Park S et al. 2023 [129]     | All-cause death, recurrent MI, stroke, and repeat revascularization                                                                                                                                          |

MI, myocardial infarction; PCI, percutaneous coronary intervention; TLR, target lesion revascularization; and TVR, target vessel revascularization

|                                                        | Gotoh F et al. 2000 | Douglas JS et al. 2005 | Chen YD et al. 2006 | Lee SW et al. 2007 | Huatt WR et al. 2008 | Huang Y et al. 2008 | Lee SW et al. 2008 | GUO T et al. 2009 | Han Y et al. 2009 | Sora Y et al. 2009 | Kakihara N et al. 2010 | Shimohara Y et al. 2010 | Kwon SU et al. 2011 | Lee SW et al. 2011 | Lee YS et al. 2011 | Shih IW et al. 2011 | Iida O et al. 2013 | Gao W et al. 2013 | Youn YI et al. 2014 | Uchiyama S et al. 2015 | Ueda H et al. 2016 | Zheng X-T et al. 2016 | Tang Y-D et al. 2017 | Lee CH et al. 2018 | Kim BI et al. 2018 | Hong S et al. 2019 | Tovoda K et al. 2019 | Chen Y-C et al. 2019 | Uchiyama S et al. 2021 | Kalantzi K et al. 2021 | Sohn M et al. 2022 | Lin T-L et al. 2022 | Wardlaw IM et al. 2023 | Paul S et al. 2023 |
|--------------------------------------------------------|---------------------|------------------------|---------------------|--------------------|----------------------|---------------------|--------------------|-------------------|-------------------|--------------------|------------------------|-------------------------|---------------------|--------------------|--------------------|---------------------|--------------------|-------------------|---------------------|------------------------|--------------------|-----------------------|----------------------|--------------------|--------------------|--------------------|----------------------|----------------------|------------------------|------------------------|--------------------|---------------------|------------------------|--------------------|
| D1: Bias arising from the randomization process.       | +                   | +                      | +                   | +                  | ?                    | +                   | +                  | +                 | +                 | +                  | +                      | +                       | +                   | +                  | +                  | +                   | +                  | +                 | +                   | +                      | +                  | +                     | +                    | +                  | +                  | +                  | +                    | +                    | +                      | +                      | +                  | +                   | +                      | +                  |
| D2: Bias due to deviations from intended intervention. | ?                   | +                      | +                   | +                  | +                    | +                   | +                  | +                 | +                 | +                  | +                      | +                       | +                   | +                  | ?                  | +                   | +                  | +                 | +                   | +                      | ?                  | ?                     | +                    | +                  | +                  | +                  | +                    | +                    | ?                      | ?                      | +                  | +                   | +                      | +                  |
| D3: Bias due to missing outcome data.                  | +                   | ?                      | +                   | +                  | +                    | +                   | ?                  | +                 | +                 | +                  | +                      | +                       | +                   | +                  | ?                  | +                   | +                  | +                 | +                   | +                      | +                  | +                     | +                    | ?                  | ?                  | +                  | +                    | +                    | +                      | +                      | +                  | +                   | +                      | +                  |
| D4: Bias in measurement of the outcome.                | +                   | +                      | +                   | +                  | ?                    | +                   | ?                  | +                 | +                 | +                  | +                      | ?                       | +                   | +                  | +                  | +                   | +                  | +                 | +                   | +                      | ?                  | +                     | +                    | +                  | +                  | +                  | +                    | +                    | +                      | +                      | +                  | +                   | +                      | +                  |
| D5: Bias in selection of the reported result.          | +                   | +                      | +                   | +                  | +                    | +                   | +                  | +                 | +                 | +                  | +                      | +                       | +                   | +                  | +                  | +                   | +                  | +                 | +                   | +                      | +                  | +                     | +                    | +                  | +                  | +                  | +                    | +                    | +                      | +                      | +                  | +                   | +                      | +                  |

Judgement: + low risk; ? some concerns; - high risk

**Supplementary Figure S1.** Risk-of-bias among trials included in the meta-analysis.

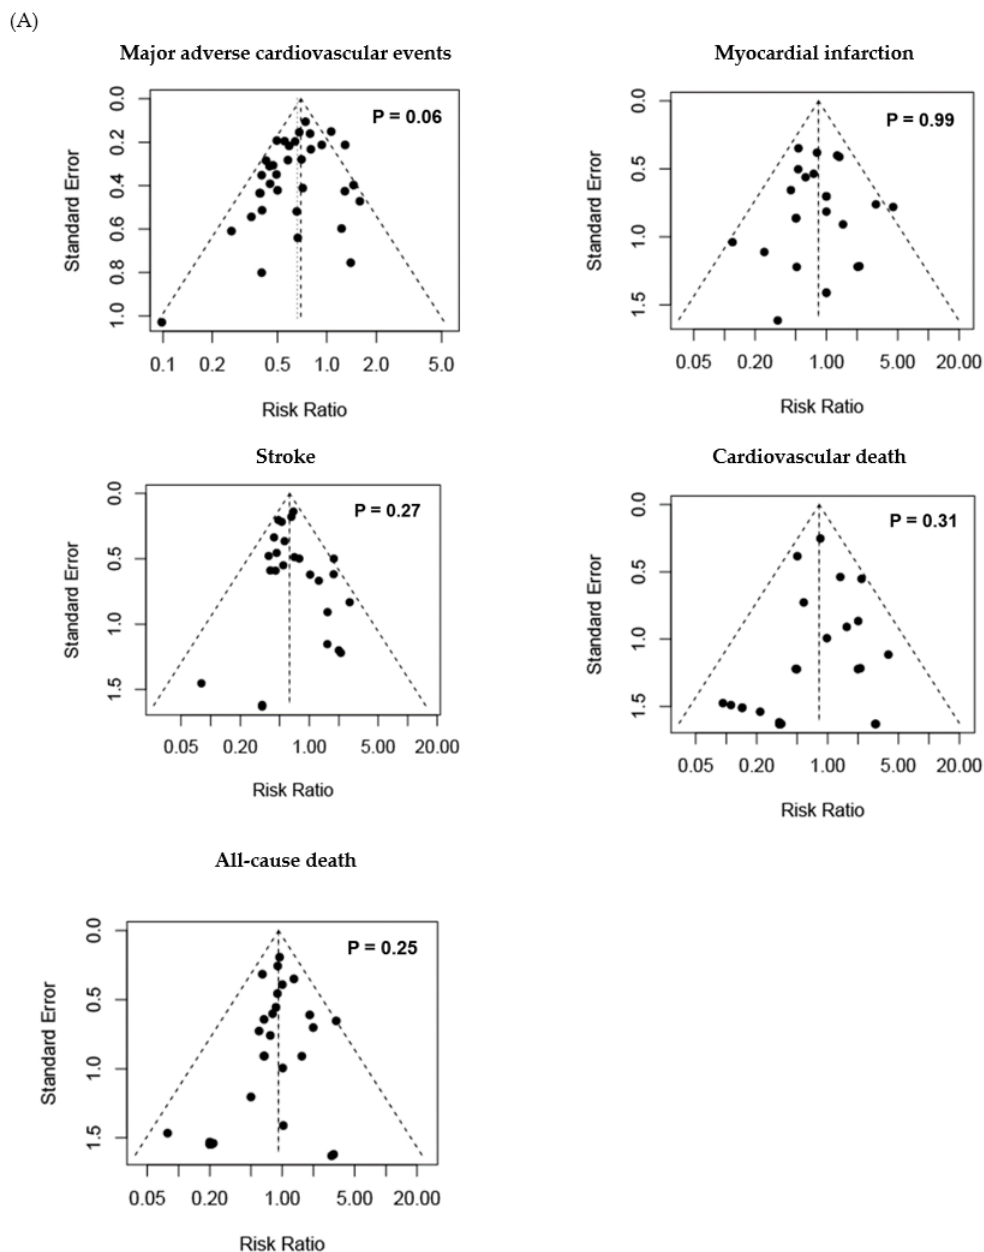

(B)

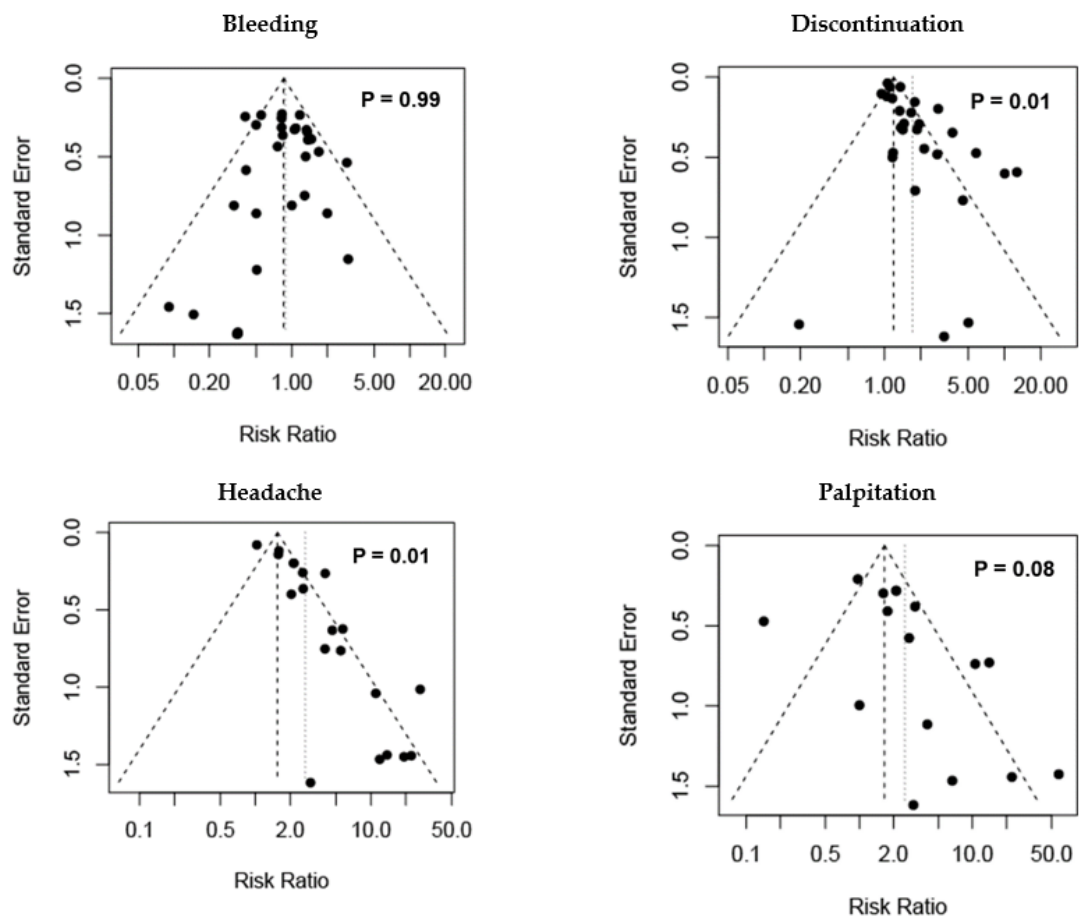

**Supplementary Figure S2.** Funnel plot of meta-analysis of clinical trials with (A) cardiovascular events and (B) other safety events.

(A)

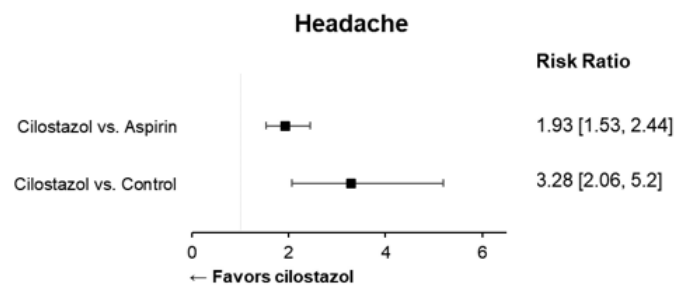

(B)

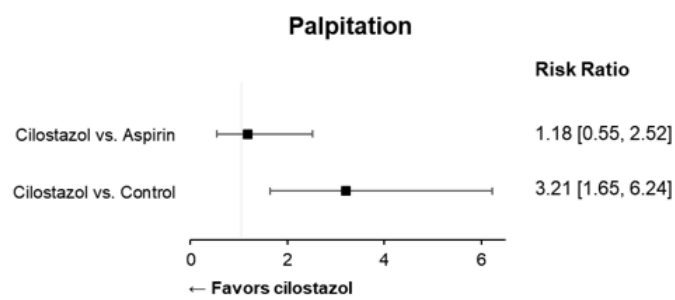

**Supplementary Figure S3.** Forest plots of cilostazol in adverse events: (A) headache and (B) palpitation.
